# Supplementary material for: Two-layer stacked multi-arm junction tiles and nanostructures assembled with small circular DNA molecules serving as scaffolds
Source: Royal Society of Chemistry journal article supplement (doi:10.1039/d0nr05860b), 2020-01-01
Supplement: d0nr05860b1.pdf [file d0nr05860b1.pdf]

## Electronic Supplementary Materials

### Two-layer stacked multiple arm junction tiles and nanostructures assembled with small circular DNA molecules serving as scaffolds

Yu Wang,<sup>a,b</sup> Wei Ge,<sup>a,b</sup> Biao Lu,<sup>a,b</sup> Jun-Jie Zhu,<sup>a,c,\*</sup> and Shou-Jun Xiao<sup>a,b,\*</sup>

<sup>a</sup> School of Chemistry and Chemical Engineering, Nanjing University, Nanjing 210023, Jiangsu, China.

<sup>b</sup> State Key Laboratory of Coordination Chemistry, Nanjing University, Nanjing 210023, Jiangsu, China.

<sup>c</sup> State Key Laboratory of Analytical Chemistry for Life Science, Nanjing University, Nanjing 210023, PR China

\*Correspondence to J-J Z: [jjzhu@nju.edu.cn](mailto:jjzhu@nju.edu.cn) or S-J X: [sjxiao@nju.edu.cn](mailto:sjxiao@nju.edu.cn)

#### This file includes:

1. Experimental materials and methods
2. DNA sequences used in this work
3. Additional figures

Fig. S1. Native PAGE photo of two-layer tiles of 3AJ<sup>2</sup> and 4AJ<sup>2</sup>

Fig. S2. Four typical types of Archimedean tilings

Fig. S3. AFM images of 3AJ<sup>2</sup>-6E of three diagonally and specifically paired E-edges with upper-lower connection

Fig. S4. AFM images of 3AJ<sup>2</sup>-6E with the same 8 nt sticky end of a palindromic sequence GTAATTAC for self-adjusting connection

Fig. S5. AFM images and parts of ladders and nanotubes with section profiles for 3AJ<sup>2</sup>-6E

Fig. S6. AFM images of two-layer 3AJ<sup>2</sup>-3E assemblies

Fig. S7. Native PAGE photo of the first-step annealing products

Fig. S8. More AFM images of (3AJ<sup>2</sup>-3E + 3AJ-3E) at 0.2 μM 3AJ<sup>2</sup>-3E

Fig. S9. More AFM images of (3AJ<sup>2</sup>-3E + 3AJ-3E) at 0.5 μM 3AJ<sup>2</sup>-3E

Fig. S10. More AFM images of (3AJ<sup>2</sup>-EOE + 3AJ-3O) with the stoichiometric ratio of 3AJ<sup>2</sup>-EOE/3AJ-3O at 3:1 and 1:1.

Fig. S11. More AFM images of 4AJ<sup>2</sup>-4E

## 1 Experimental materials and methods

All DNA strands were provided with denaturing PAGE (polyacrylamide gel electrophoresis) purification by Sangon Biotech (Shanghai, China) without further purification. Detailed DNA sequences and structural designs are shown in the following sections. T4 DNA ligase and exonuclease I were from Takara Biotechnology Co., Ltd. (Dalian, China). Mica sheets for AFM were from Nanjing Zhongjingkeyi Technology Co., Ltd (Nanjing, China). Pure water was from Milli-Q Ultrapure Water Purification System (Merck Millipore, Shanghai, China). The buffer of 1×TBE is composed of 89 mM Tris, 89 mM boric acid, and 2 mM EDTA at pH 8.0, and that of 1×TAE-Mg<sup>2+</sup> is composed of 40 mM Tris, 40 mM HAc, 40 mM Mg(Ac)<sub>2</sub> and 2 mM EDTA at pH 8.0. (Sangon Biotech, Shanghai, China)

**Preparation of circular DNA.** The circular DNAs of 72 and 96 nt were circularised by T4 DNA ligase. Firstly, a 5'-phosphorylated DNA strand (3.5 μM) and its corresponding 20 nt splint strand (4.5 μM) were mixed in 80 μL TE buffer (pH = 8.0). The sample was heated to 95 °C for 5 minutes, then cooled down to room temperature within 4 hours. The T4 ligase (350 U/μL, 10 μL) and 10×T4 buffer (10 μL) were added to the sample, then the mixture was incubated for 16 hours at 16 °C. After reaction, the T4 ligase was inactivated at 95 °C for 5 minutes. Then, 10 μL 10×exonuclease I buffer and 10 μL exonuclease I (5 U/μL) were added to digest the remaining linear DNA residues of templates and splints by incubation at 37 °C for 30 minutes. Exonuclease I selectively digested single-stranded DNAs, and left circular DNAs intact. The circular DNA strands were purified by denaturing PAGE.

**Assembly of DNA nanostructures via the one-pot protocol.** 3AJ<sup>2</sup>-6E, 3AJ<sup>2</sup>-3E, and 4AJ<sup>2</sup>-4E were assembled via mixing DNA strands with an equimolar stoichiometric ratio at a final concentration of 0.2 μM (the concentration will be the same in the following contents unless otherwise noted) in 50 μL 1×TAE-Mg<sup>2+</sup> buffer. The mixture was annealed in a thermocycler programmed to cool as follows: 95 °C to 60 °C at a rate of 1 °C per 5 minutes, then at a rate of 0.1°C per 10 minutes to 20 °C, and finally held at 20 °C at the end of the cycle.

**Assembly of DNA nanostructures via the two-pot protocol.** Two assemblies of (3AJ<sup>2</sup>-3E + 3AJ-3E) and (3AJ<sup>2</sup>-EOE + 3AJ-3O) were assembled via the two-pot protocol. In the

first step, each tile (either 3AJ<sup>2</sup>-3E, 3AJ-3E, 3AJ<sup>2</sup>-EOE, or 3AJ-3O) was annealed following the one-pot approach. In the second step, one third volume of a one-layer tile (3AJ-3E or 3AJ-3O) was added correspondingly to the annealed two-layer tile (3AJ<sup>2</sup>-3E, or 3AJ<sup>2</sup>-EOE) and gently mixed. Then, the mixture was annealed in a thermocycler programmed to cool from 50 °C to 4 °C in about 52 h: 50 °C to 20 °C at a rate of 0.1 °C per 10 minutes, then at a rate of 1°C per 10 minutes to 4°C, and finally held at 4 °C at the end of the cycle. The high concentration (0.5 μM) and off-ratio mixtures were prepared according to designs and annealed with the two-pot protocol.

#### **Native PAGE of 3AJ<sup>2</sup> and 4AJ<sup>2</sup>.**

The annealed sample (circa 5 μL) of 3AJ<sup>2</sup> or 4AJ<sup>2</sup> with each arm carrying a 7 bp blunted overhang was mixed with the same amount of Glycerol Gel Loading Buffer (0.25% Bromophenol Blue; 0.25% Xylene Cyanole FF; 60% Glycerol), then subjected to native PAGE (8%) in an ice-water bath. A DNA Marker B (10 mM Tris-HCl (pH 7.6), 10 mM EDTA, 0.033% bromophenol blue, 0.008% xylene cyanol and 10% glycerol) was added in the first lane as the migration standard (bands of 100, 200, 300, 400, 500, 600 bp from bottom to top). Electrophoresis was carried out in 8% native polyacrylamide gel for 5 hours at 90 V in 1×TAE-Mg<sup>2+</sup> buffer. Dyed by 4S GelRed for 1 hour, the gel was scanned using a Tanon 2500R laser scanner.

#### **Native PAGE for the first-step products of 3AJ<sup>2</sup>-3E and 3AJ<sup>2</sup>-EOE.**

The first-step annealed samples of 3AJ<sup>2</sup>-3E and 3AJ<sup>2</sup>-EOE were mixed with the same amount of Glycerol Gel Loading Buffer VII (0.25% Bromophenol Blue; 0.25% Xylene Cyanole FF; 60% Glycerol) separately. A DNA Marker F plus (10 mM Tris-HCl (pH 7.6), 10 mM EDTA, 0.033% bromophenol blue, 0.008% xylene cyanol and 10% glycerol) was added in the first lane as the migration standard (bands of 200, 400, 600, 800, 1000, 1200, 1400, 1600, 1800, 2000 bp from bottom to top). Electrophoresis was carried out in 4% native polyacrylamide gel at 90 V in 1×TAE-Mg<sup>2+</sup> buffer. Dyed by 4S GelRed for 1 hour, the gel was scanned using a Tanon 2500R laser scanner.

**AFM imaging.** A 2 μl annealed sample solution was spotted onto a freshly cleaved mica surface and stayed about 1 min for adsorption of DNA arrays to the mica surface. To get rid of debris, 70 μl 1× TAE-Mg<sup>2+</sup> buffer was deposited onto the sample spot and moved away. Then 1× TAE-Mg<sup>2+</sup> buffer was deposited on the spot and to the AFM tip

at 70  $\mu\text{l}$  and 30  $\mu\text{l}$ , separately. AFM imaging was carried out with the ScanAsyst mode in fluid (Dimension FastScan, Bruker) with Scanasyst-Fluid+ tips (Bruker).

## 2 DNA sequences used in this work

3AJ<sup>2</sup>-6E (with three diagonally and specifically paired E-edges via upper-lower connection)

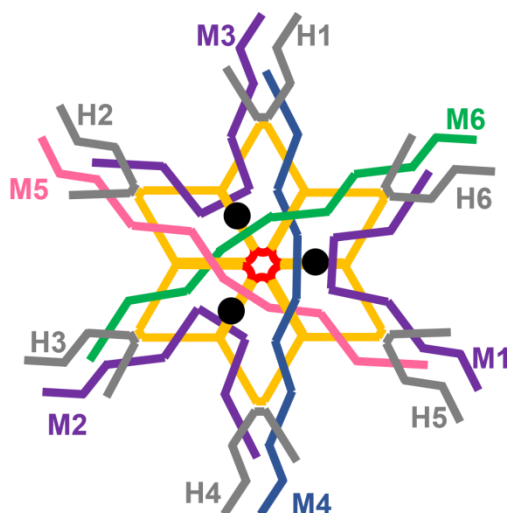

|    |                                                                               |
|----|-------------------------------------------------------------------------------|
| C1 | TAAGATGAAGATAGCGCACAATTTCCGGTCCGATTCCGTCTCTGTCTTTA<br>ACTCGTCTATGCCAAGCCCGTTT |
| C2 | GCGATAATCTCTGTGGACTGATTTGGGTACTCCACCAGGTAGGCGTTTA<br>CGATCATCCTAAGCACCTTGTTT  |
| H1 | TCCTCAGGCATCGCGCACGTAG                                                        |
| H2 | GCACCGCGCGCATGTCGAACTC                                                        |
| H3 | CGAAGTACGATCCCACGACCGG                                                        |
| H4 | CGATCCAACTGCGCGGACGTGC                                                        |
| H5 | CTTCTTATATACGCTTCGCCCG                                                        |
| H6 | ACCGGCCTCGCGATCGGCCGCC                                                        |
| M1 | CGGTGCCGGGCGAAAGATTATCAGAGACGGATCGCGAG                                        |
| M2 | GCCGGTCCGGTCGTTGGAGTACTGCGCTATCATGCGCG                                        |
| M3 | GGATCGCTACGTGCGGATGATCGCTTGGCAGCGCAGTT                                        |
| M4 | TGAGGAGCACGTCCTAGACGAGTTGACGCCAAGGTGCTTAGCGATGCC                              |
| M5 | ACTTCGGGCGGCCGAATCCGACCGTTGCCTCAGTCCACAGGCGTATAT                              |
| M6 | AAGAAGGAGTTCGACTTCATCTTACGGGTGCGCTACCTGGGGGATCGT                              |

3AJ<sup>2</sup>-6E (with the same 8 nt sticky end of a palindromic sequence

**GTAATTAC** for self-adjusting connection)

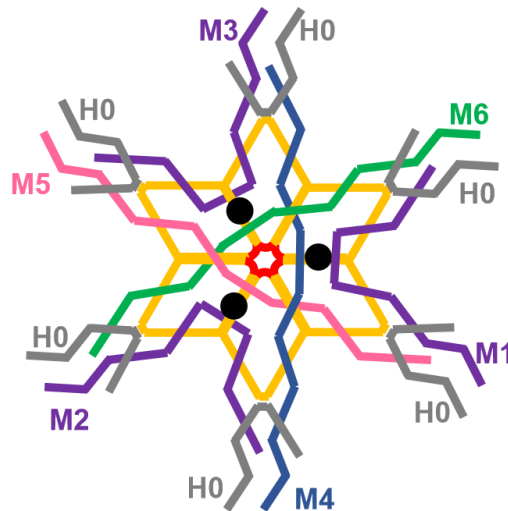

|    |                                                                              |
|----|------------------------------------------------------------------------------|
| C1 | TAAGATGAAGATAGCGCACAAATTCGGTCGGATTCCGTCTCTG<br>TCTTAACTCGTCTATGCCAAGCCCGTTT  |
| C2 | GCGATAATCTCTGTGGACTGATTTGGGTACTCCACCAGGTAGG<br>CGTTTACGATCATCCTAAGCACCTTGTTT |
| H0 | TATGTTCACTCTCG <b>GTAATTAC</b>                                               |
| M1 | CGAGAGTAGATTATCTGCGCTATGAACATAG <b>GTAATTAC</b>                              |
| M2 | CGAGAGTTGGAGTACGCTTGGCAGAACATAG <b>GTAATTAC</b>                              |
| M3 | CGAGAGTGGATGATCAGAGACGGGAACATAG <b>GTAATTAC</b>                              |
| M4 | CGAGAGTTAGACGAGTTGACGTCGCCTACCTGGGAACATAG <b>GT<br/>AATTAC</b>               |
| M5 | CGAGAGTCTTCATCTTACGGCCTCAGTCCACAGGAACATAG <b>GT<br/>ATTAC</b>                |
| M6 | CGAGAGTAATCCGACCGTTGGCCAAGGTGCTTAGAACATAG <b>GT<br/>AATTAC</b>               |

3AJ<sup>2</sup>-6E (with an asymmetric design using all six arms for connection in

Figure 2)

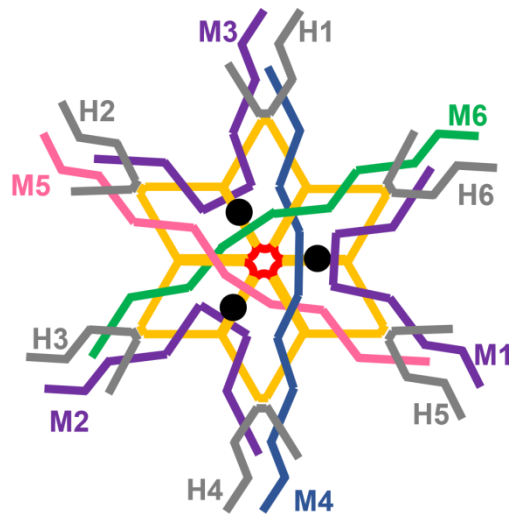

|    |                                                                              |
|----|------------------------------------------------------------------------------|
| C1 | TAAGATGAAGATAGCGCACAATTTCCGGTCGGATTCCGTCTCTG<br>TCTTAACTCGTCTATGCCAAGCCCGTTT |
| C2 | GCGATAATCTCTGTGGACTGATTTGGGTACTCCACCAGGTAGG<br>CGTTTACGATCATCCTAAGCACCTTGTTT |
| H1 | TCCTCAGGCATCGCGCACGTAG                                                       |
| H2 | GCACCGCGCGCATGTGCGAACTC                                                      |
| H3 | CGAAGTACGATCCCACGACCGG                                                       |
| H4 | CGATCCAAGTGGCGGGACGTGC                                                       |
| H5 | CTTCTTATATACGCTTCGCCCG                                                       |
| H6 | ACCGGCCTCGCGATCGGCCGCC                                                       |
| M1 | ACTTCGCGGGCGAAAGATTATCAGAGACGGATCGCGAG                                       |
| M2 | AAGAAGCCGGTCGTTGGAGTACTGCGCTATCATGCGCG                                       |
| M3 | GGATCGCTACGTGCGGATGATCGCTTGGCAGCGCAGTT                                       |
| M4 | TGAGGAGCACGTCCTAGACGAGTTGACGCCAAGGTGCTTAGC<br>GATGCC                         |
| M5 | GCCGGTGAGTTCGACTTCATCTTACGGGTCGCCTACCTGGGGG<br>ATCGT                         |
| M6 | CGGTGCGGGCGGCCGAATCCGACCGTTGCCTCAGTCCACAGGC<br>GTATAT                        |

3AJ<sup>2</sup>-3E

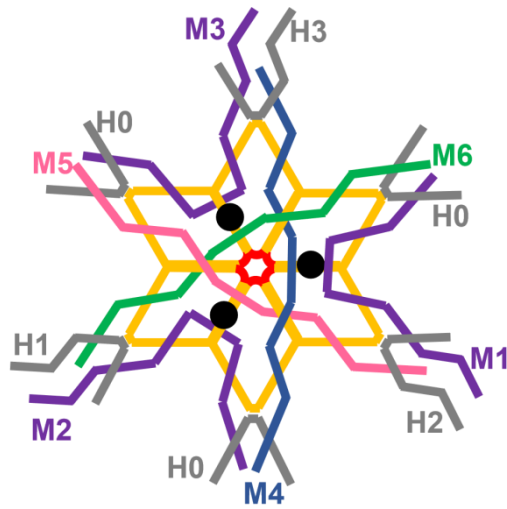

|    |                                                                              |
|----|------------------------------------------------------------------------------|
| C1 | TAAGATGAAGATAGCGCACAAATTCGGTCGGATTCCGTCTCTGT<br>CTTTAACTCGTCTATGCCAAGCCCGTTT |
| C2 | GCGATAATCTCTGTGGACTGATTTGGGTACTCCACCAGGTAGG<br>CGTTTACGATCATCCTAAGCACCTTGTTT |
| H0 | TCCCTCTGGGCCTT                                                               |
| H1 | TCCTCAGGCATCGCGCACGTAG                                                       |
| H2 | GCACCGCGCGCATGTCGAACTC                                                       |
| H3 | ACGCGTACGATCCCACGACCGG                                                       |
| M1 | TGAGGAGAGTTCGAAGATTATCAGAGACGGAGAGGGA                                        |
| M2 | CGGTGCCTACGTGCTGGAGTACTGCGCTATAGAGGGA                                        |
| M3 | ACGCGTCCGGTCGTGGATGATCGCTTGGCAAGAGGGA                                        |
| M4 | AAGGCCCTAGACGAGTTGACGCCAAGGTGCTTAGGGATCGT                                    |
| M5 | AAGGCCCAATCCGACCGTTGCCTCAGTCCACAGCATGCGCG                                    |
| M6 | AAGGCCCTTCATCTTACGGGTCGCCTACCTGGGCGATGCC                                     |



3AJ<sup>2</sup>-3E + 3AJ-3E

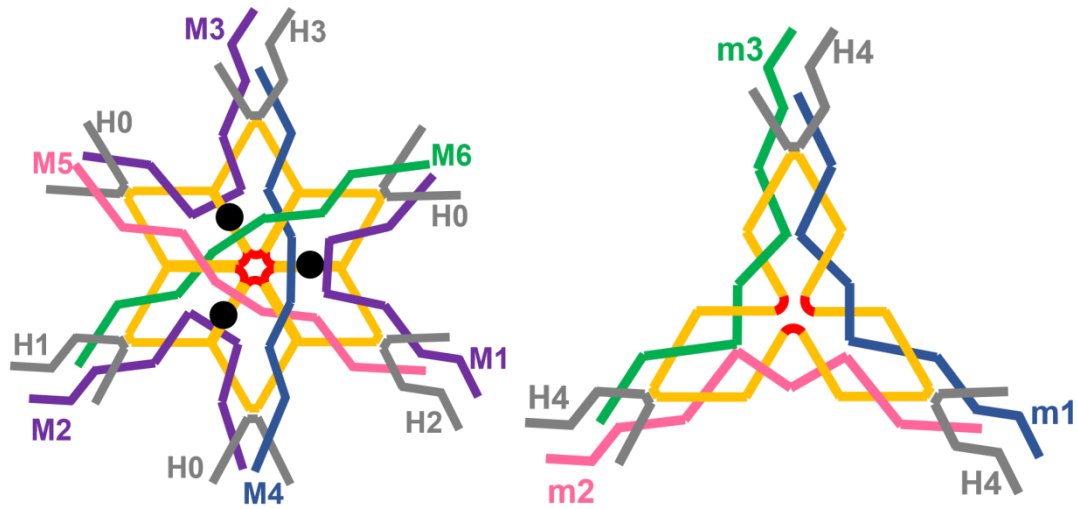

|    |                                                                              |
|----|------------------------------------------------------------------------------|
| C1 | TAAGATGAAGATAGCGCACAAATTCGGTCGGATTCCGTCTCTGT<br>CTTTAACTCGTCTATGCCAAGCCCGTTT |
| C2 | GCGATAATCTCTGTGGACTGATTTGGGTACTCCACCAGGTAGG<br>CGTTTACGATCATCCTAAGCACCTTGTTT |
| H0 | TCCCTCTGGGCCTT                                                               |
| H1 | TCCTCAGGCATCGCGCACGTAG                                                       |
| H2 | GCACCGCGCGCATGTCGAACTC                                                       |
| H3 | CGAAGTACGATCCCACGACCGG                                                       |
| M1 | TGAGGAGAGTTCGAAGATTATCAGAGACGGAGAGGGA                                        |
| M2 | CGGTGCCTACGTGCTGGAGTACTGCGCTATAGAGGGA                                        |
| M3 | GGATCGCCGGTCGTGGATGATCGCTTGGCAAGAGGGA                                        |
| M4 | AAGGCCCTAGACGAGTTGACGCCAAGGTGCTTAGGGATCGT                                    |
| M5 | AAGGCCCAATCCGACCGTTGCCTCAGTCCACAGCATGCGCG                                    |
| M6 | AAGGCCCTTCATCTTACGGGTCGCCTACCTGGGCGATGCC                                     |
| C1 | TAAGATGAAGATAGCGCACAAATTCGGTCGGATTCCGTCTCTGT<br>CTTTAACTCGTCTATGCCAAGCCCGTTT |
| H4 | CGATCCAACTGCGCGGACGTGC                                                       |
| m1 | ACTTCGGCACGTCCCTTCATCTTACGGGCTTGGCAGCGCAGTT                                  |
| m2 | ACTTCGGCACGTCCAATCCGACCGTTGTGCGCTATGCGCAGTT                                  |
| m3 | ACTTCGGCACGTCTAGACGAGTTGACAGAGACGGGCGCAGTT                                   |

3AJ<sup>2</sup>-EOE + 3AJ-30

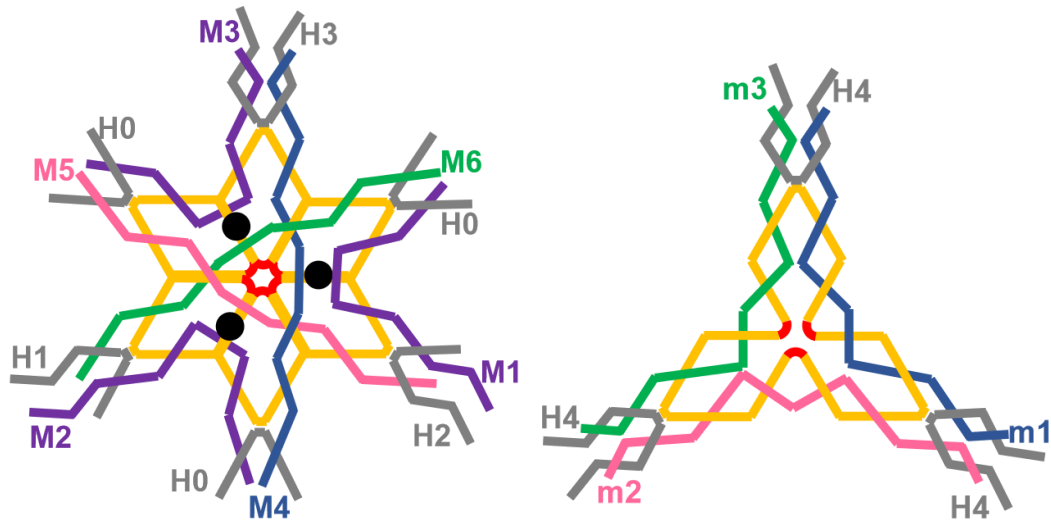

|    |                                                                              |
|----|------------------------------------------------------------------------------|
| C1 | TAAGATGAAGATAGCGCACAAATTCGGTCGGATTCCGTCTCTGT<br>CTTTAACTCGTCTATGCCAAGCCCGTTT |
| C2 | GCGATAATCTCTGTGGACTGATTTGGGTACTCCACCAGGTAGG<br>CGTTTACGATCATCCTAAGCACCTTGTTT |
| H0 | TCCCTCTGGGCCTT                                                               |
| H1 | <b>TCCTCA</b> GGCATCGCGCACGTAG                                               |
| H2 | <b>CGAAGT</b> ACGATCCCACGACCGG                                               |
| H3 | <b>CGAGTC</b> CAAGTCCGTTAACCATTGGT <b>CCTTCT</b>                             |
| M1 | <b>TGAGGA</b> CCGGTCGTAGATTATCAGAGACGGAGAGGGA                                |
| M2 | <b>ACTTCG</b> CTACGTGCTGGAGTACTGCGCTATAGAGGGA                                |
| M3 | ACCAATGGTTGGATGATCGCTTGGCAAGAGGGA                                            |
| M4 | AAGGCCCTAGACGAGTTGACGCCAAGGTGCTTAAACGGACTTG                                  |
| M5 | AAGGCCCAATCCGACCGTTGCCTCAGTCCACAGGGGATCGT                                    |
| M6 | AAGGCCCTTCATCTTACGGGTCGCCTACCTGGGCGATGCC                                     |
| C1 | TAAGATGAAGATAGCGCACAAATTCGGTCGGATTCCGTCTCTGT<br>CTTTAACTCGTCTATGCCAAGCCCGTTT |
| H4 | <b>GACTCG</b> CAAGTCCGTTAACCATTGGT <b>AGAAGG</b>                             |
| m1 | ACCAATGGTTCTTCATCTTACGGGCTTGGCAAACGGACTTG                                    |
| m2 | ACCAATGGTTAATCCGACCGTTGTGCGCTATAACGGACTTG                                    |
| m3 | ACCAATGGTTTAGACGAGTTGACAGAGACGGAACGGACTTG                                    |

4AJ<sup>2</sup>-4E (sticky end cohesion with the palindromic sequence **ACGCGT**)

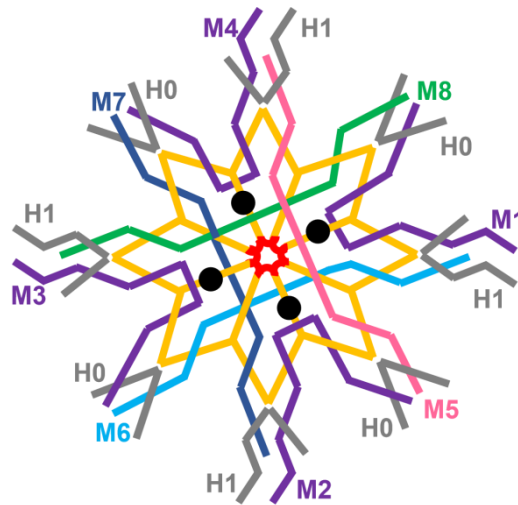

|    |                                                                                                          |
|----|----------------------------------------------------------------------------------------------------------|
| C1 | GGTAGCTAACTATGTTGCCTGTTTCCACTACAACAGTATCTAAG<br>CTTTCGTGTGTGGGGAACATCCACATTTCTTTAGTGAATCGAAG<br>CGCGGTTT |
| C2 | CGGAATTAGTGGCGAAGTACGTTTATTCCAAGACCGACGTACG<br>AATTTACAACATGCGGATGTGACGATTTGCTTCTACGATATGC<br>TTCGTCTTT  |
| H0 | TCCCTCTGGGCCTT                                                                                           |
| H1 | <b>ACGCGT</b> CTCGCGATCGGCCGCC                                                                           |
| M1 | <b>ACGCGT</b> GGCGGCCGAGTTAGCTGTCACATCAGAGGGA                                                            |
| M2 | <b>ACGCGT</b> GGCGGCCGATTCACTACGAAGCATAGAGGGA                                                            |
| M3 | <b>ACGCGT</b> GGCGGCCGCCCCACACTACTTCGCAGAGGGA                                                            |
| M4 | <b>ACGCGT</b> GGCGGCCGTGTTGTAGCGTACGTCAGAGGGA                                                            |
| M5 | AAGGCCCATCGTAGAAGCTCACCCGCGCTTCGATCGCGAG                                                                 |
| M6 | AAGGCCCCGCATAGTTGTTTTGGCAGGCAACATATCGCGAG                                                                |
| M7 | AAGGCCCGGTCTTGGAATCGACGGCTTAGATACATCGCGAG                                                                |
| M8 | AAGGCCCCACTAATTCCGGAAAGTGTGGATGTTATCGCGAG                                                                |

4A<sub>J</sub><sup>2</sup>-4E (adjacent connection with specific base pairing for the  
Archimedean tiling 3-6-3-6)

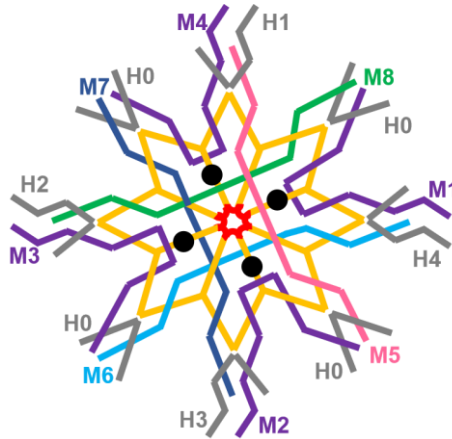

|    |                                                                                                           |
|----|-----------------------------------------------------------------------------------------------------------|
| C1 | GGTAGCTAACTATGTTGCCTGTTTCCACTACAACAGTATCTAAG<br>CTTTCGTGTGTGGGGAACATCCACATTTCTTTAGTGAATCGAAG<br>CGCGGTTT  |
| C2 | CGGAATTAGTGGCGAAGTACGTTTATTCCAAGACCGACGTACG<br>AATTTACAACATATGCGGATGTGACGATTTGCTTCTACGATATGC<br>TTCGTCTTT |
| H0 | TCCCTCTGGGCCTT                                                                                            |
| H1 | TCCTCAGGCATCGCGCACGTAG                                                                                    |
| H2 | GCACCGCGCGCATGTCTGAACTC                                                                                   |
| H3 | CGAAGTACGATCCCACGACCGG                                                                                    |
| H4 | CGATCCAACATGCGCGGACGTGC                                                                                   |
| M1 | ACTTCGCTACGTGCAGTTAGCTGTACATCAGAGGGA                                                                      |
| M2 | GGATCGGAGTTCGAATCACTACGAAGCATAGAGGGA                                                                      |
| M3 | TGAGGAGCCGGTTCGTCACCACTACTTCGCAGAGGGA                                                                     |
| M4 | CGGTGCGCACGTCTGTTGTAGCGTACGTACAGAGGGA                                                                     |
| M5 | AAGGCCCATCGTAGAAGCTCACCCGCGCTTCGCATGCGCG                                                                  |
| M6 | AAGGCCCCGCATAGTTGTTTTGGCAGGCAACATGCGATGCC                                                                 |
| M7 | AAGGCCCGGTCTTGAATCGACGGCTTAGATACGCGCAGTT                                                                  |
| M8 | AAGGCCCCACTAATTCCGGAAAGTGTGGATGTTGGGATCGT                                                                 |

### 3 Additional figures

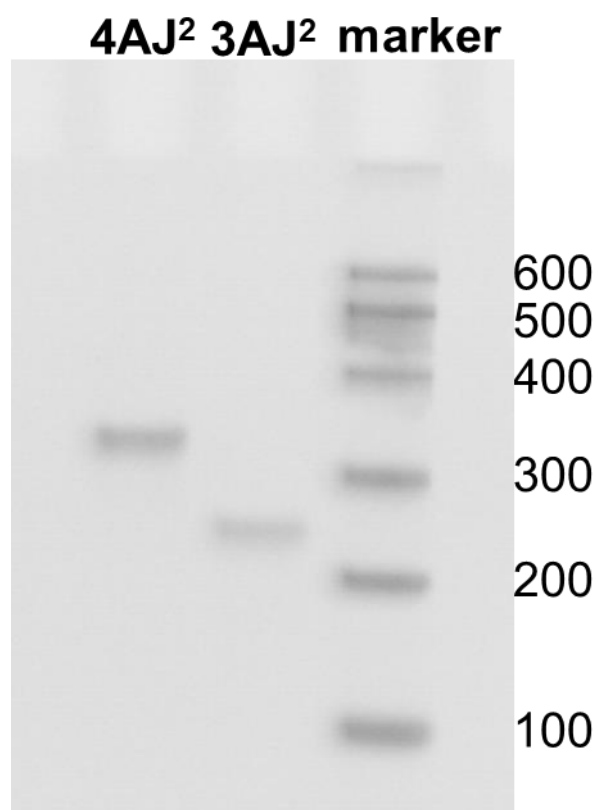

**Fig. S1.** Native PAGE photo of two-layer tiles of 3AJ<sup>2</sup> and 4AJ<sup>2</sup>, with each arm carrying a 7 bp blunted overhang. PAGE analysis was carried out at 4 °C. The structure name for each sample is indicated at the top of the gel lane, and the right lane is a DNA ladder (DNA Marker B, Sangon, Shanghai, China).

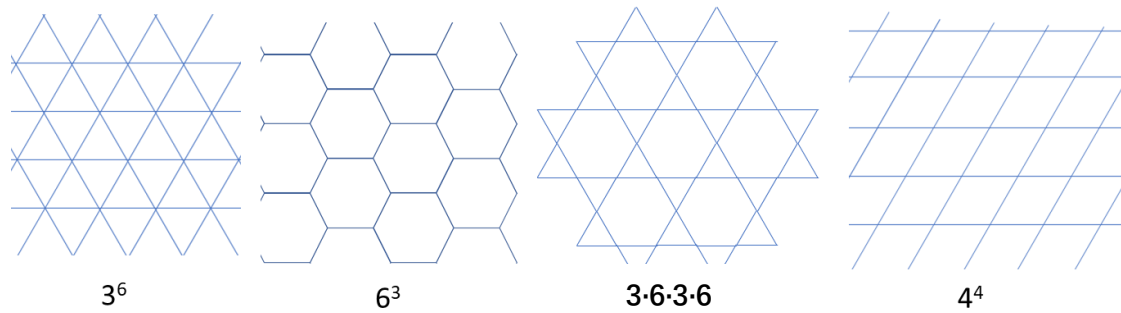

**Fig. S2** Four typical types of Archimedean tiling patterns.

We will prove that using all 6 arms of a  $3AJ^2$  tile (either  $3AJ^2-6E$  or  $3AJ^2-6O$ ) to construct the  $3^6$  tiling pattern, at least an upper-lower connection is a must. First, the tile core of  $3AJ^2$  is sitting at every pivot point, and every edge (or the connection arm between every two tile cores) must be equal, which means either  $3AJ^2-6E$  or  $3AJ^2-6O$ , but not combination of them, can be used for tiling  $3^6$ . Then we take the basic unit of the smallest regular triangle for analysis. In the smallest regular triangle, every tile at vertices must use two adjacent arms for connection, one upper and one lower arm. There are only two connection modes: 1) every edge is joined with the upper-lower connection (the three diagonal connection mode described in the main text body); 2) one edge is joined with the upper-upper (or lower-lower) connection between two adjacent tiles (vertices), then the rest of two edges from the two adjacent tiles (vertices) connected to the third tile (or the third vertex) must have one edge with the upper-lower connection because the adjacent arms of the third tile must be at the upper and lower positions, separately.

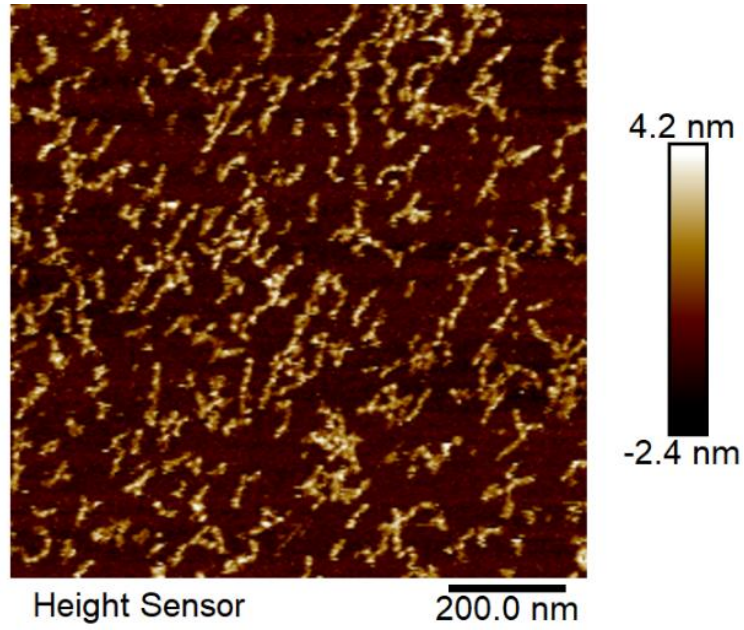

**Fig. S3.** AFM images of 3AJ<sup>2</sup>-6E of three diagonally and specifically paired E-edges with upper-lower connection.

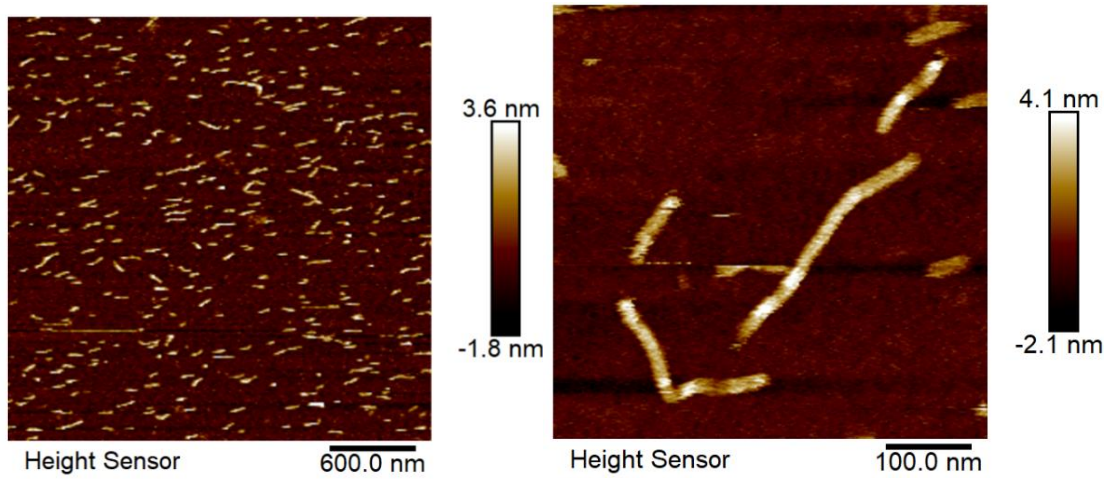

**Fig. S4.** AFM images of 3AJ<sup>2</sup>-6E with the same 8 nt sticky end of a palindromic sequence GTAATTAC for self-adjusting connection.



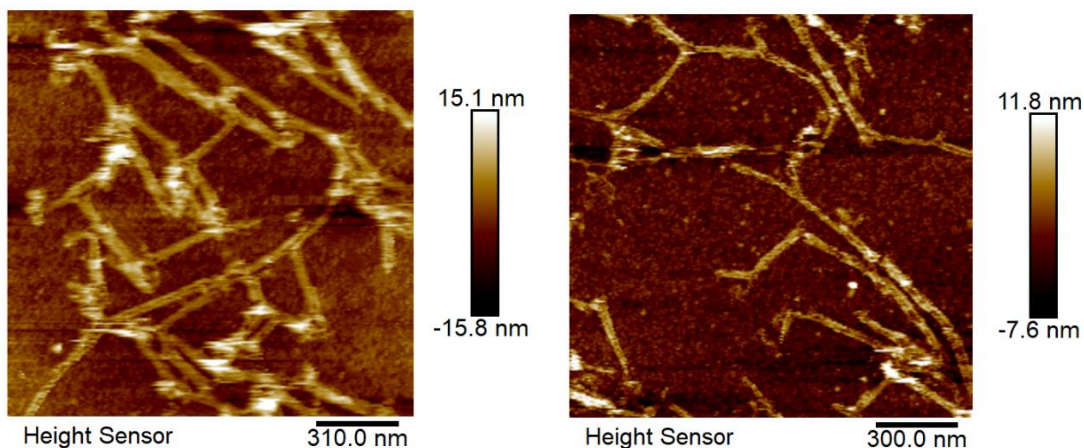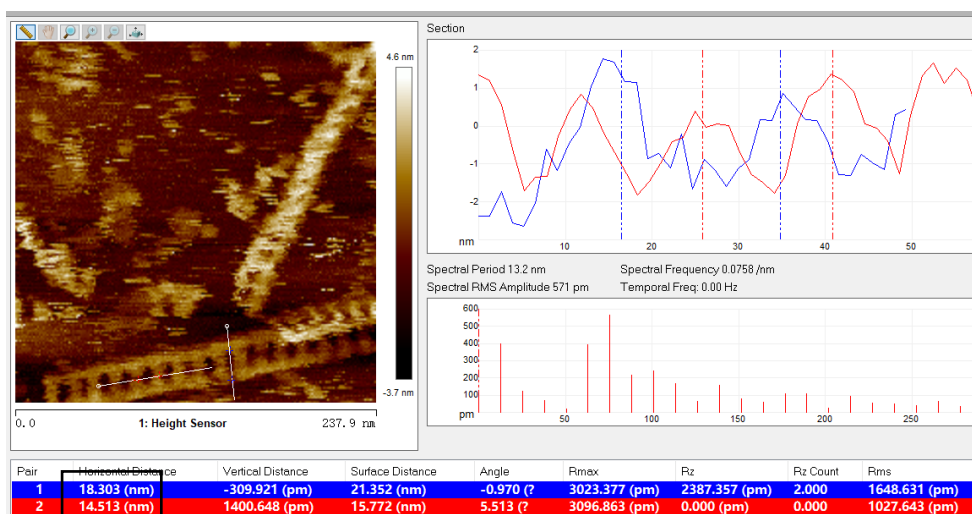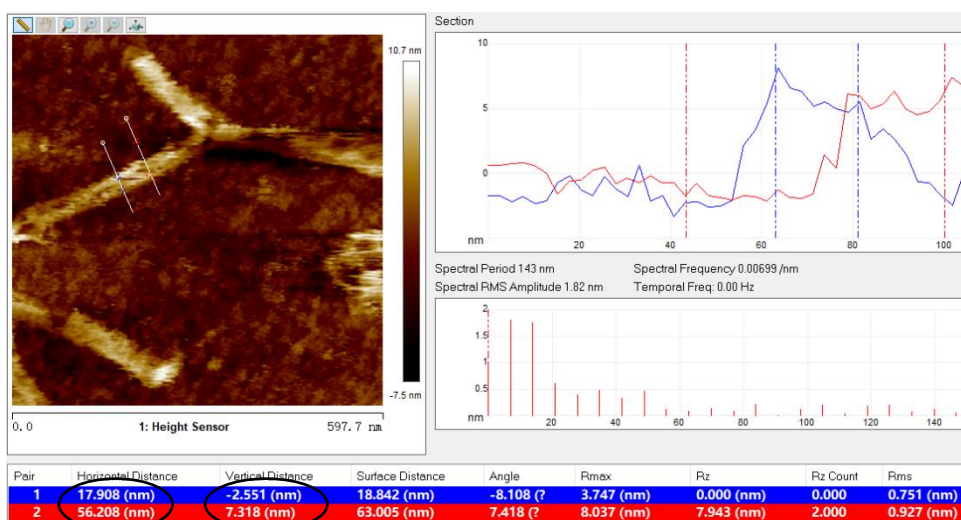

**Fig. S5.** More AFM images and parts of ladders and nanotubes with section profiles for 3AJ<sup>2</sup>-6E with asymmetric connection in Figure 2.



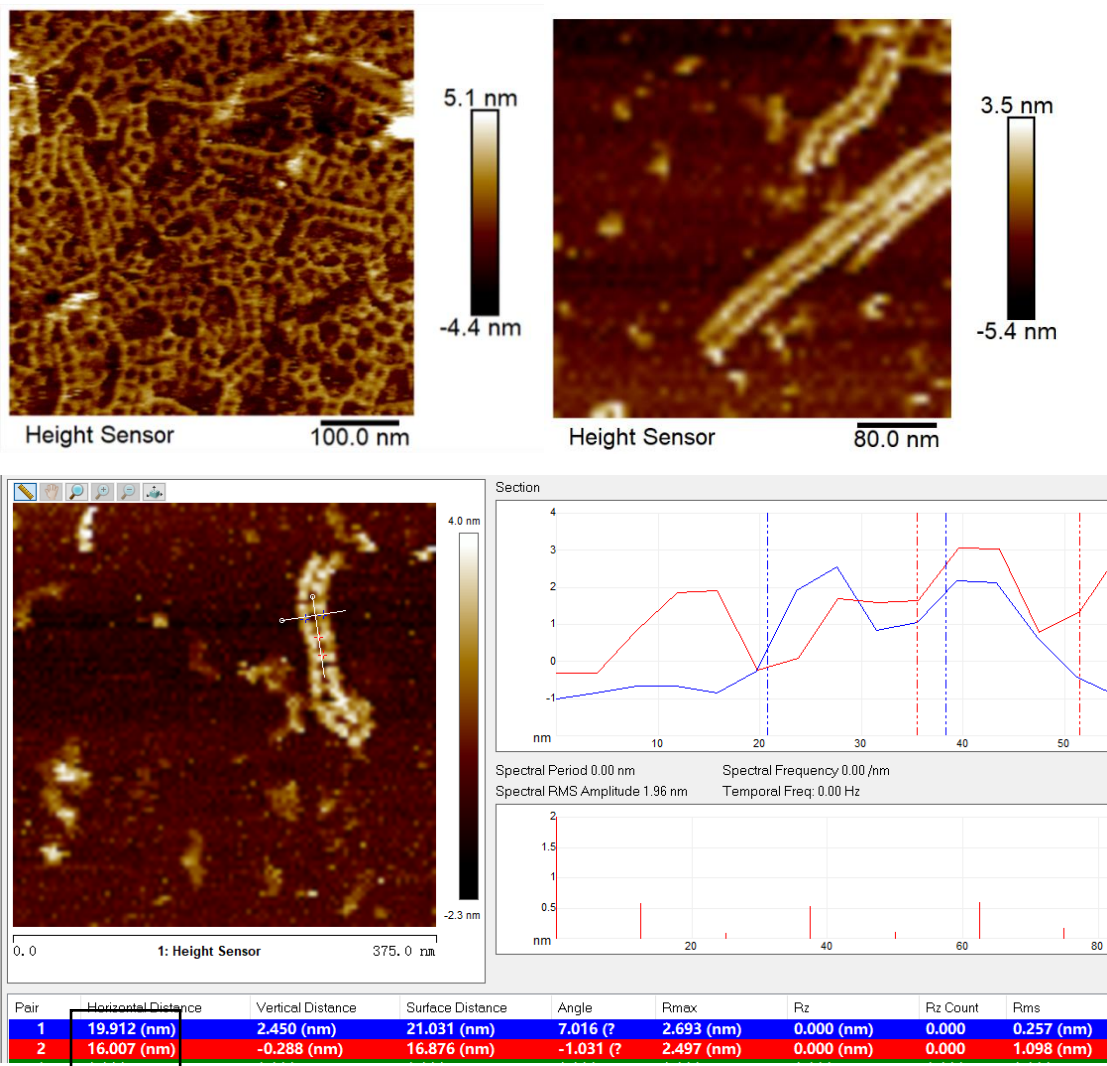

**Fig. S6.** AFM images of two-layer 3AJ<sup>2</sup>-3E assemblies and a selected ladder structure with section profiles.

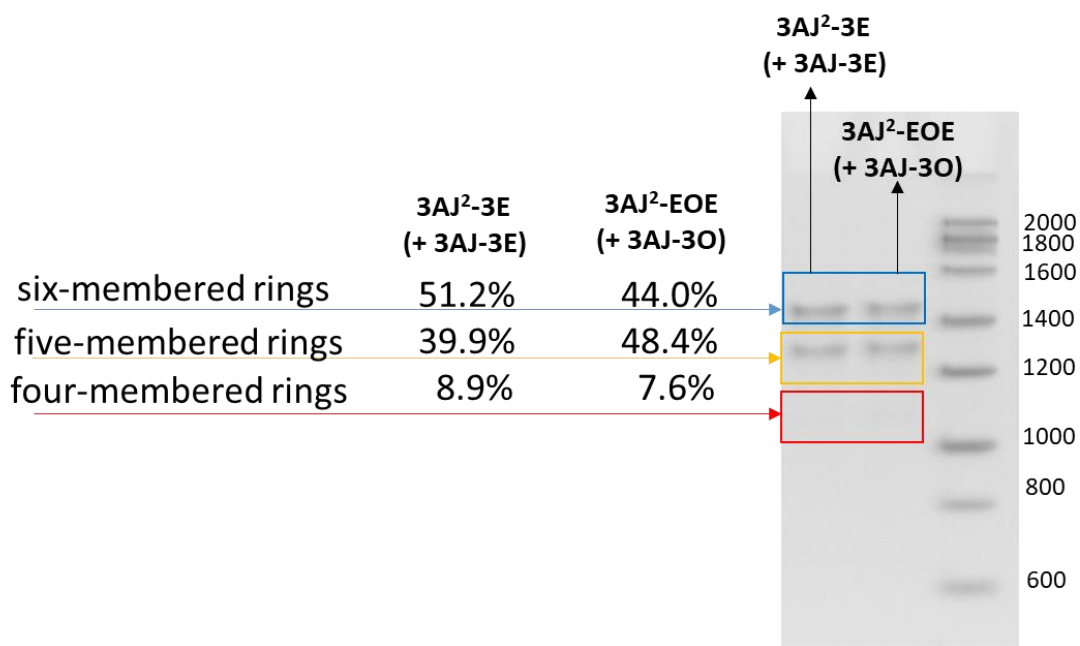

**Fig. S7.** Native PAGE photo of the first-step products of 3AJ<sup>2</sup>-3E with E4-E4' connection and 3AJ<sup>2</sup>-EOE with E6-E6' connection. Native PAGE was carried out at 4 °C. The structure symbol for each sample is indicated at the top of the gel lane and the product identities are directed by arrow lines. The proportion of each component is analysed with image J and listed at the left side.

### Sample 1

Number<sub>total</sub> = 54

Number<sub>red</sub> = 14 + 13 = 27; Number<sub>red</sub> / Number<sub>total</sub> = 50.0%

Number<sub>yellow</sub> = 7 + 11 = 18; Number<sub>yellow</sub> / Number<sub>total</sub> = 33.3%

Number<sub>blue</sub> = 6 + 3 = 9; Number<sub>blue</sub> / Number<sub>total</sub> = 16.7%

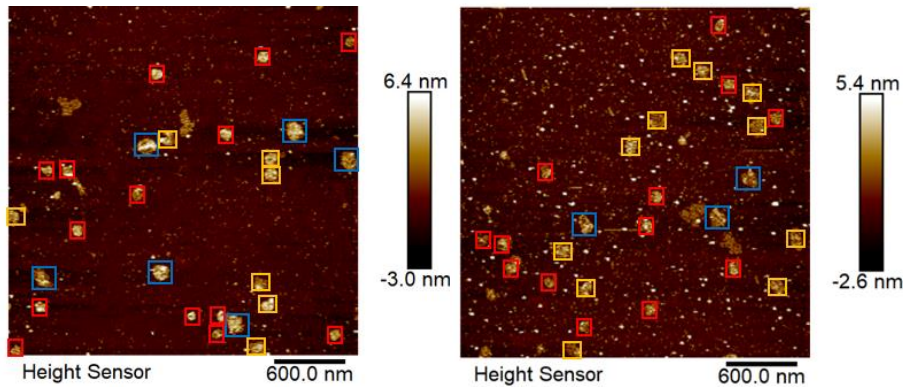

### Sample 2

Number<sub>total</sub> = 38

Number<sub>red</sub> = 8 + 9 = 17; Number<sub>red</sub> / Number<sub>total</sub> = 44.7%

Number<sub>yellow</sub> = 8 + 7 = 15; Number<sub>yellow</sub> / Number<sub>total</sub> = 39.5%

Number<sub>blue</sub> = 4 + 2 = 6; Number<sub>blue</sub> / Number<sub>total</sub> = 15.8%

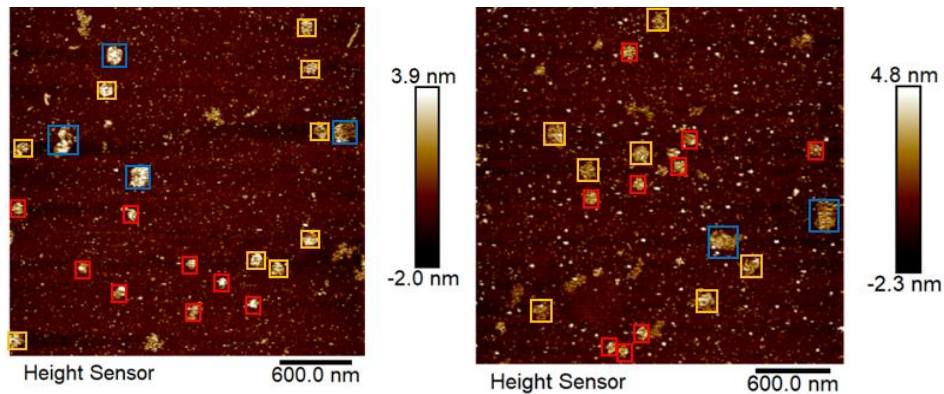

### Sample 3

Number<sub>total</sub> = 44

Number<sub>red</sub> = 16 + 6 = 22; Number<sub>red</sub> / Number<sub>total</sub> = 50.0%

Number<sub>yellow</sub> = 12 + 6 = 18; Number<sub>yellow</sub> / Number<sub>total</sub> = 40.9%

Number<sub>blue</sub> = 4 + 0 = 4; Number<sub>blue</sub> / Number<sub>total</sub> = 9.1%

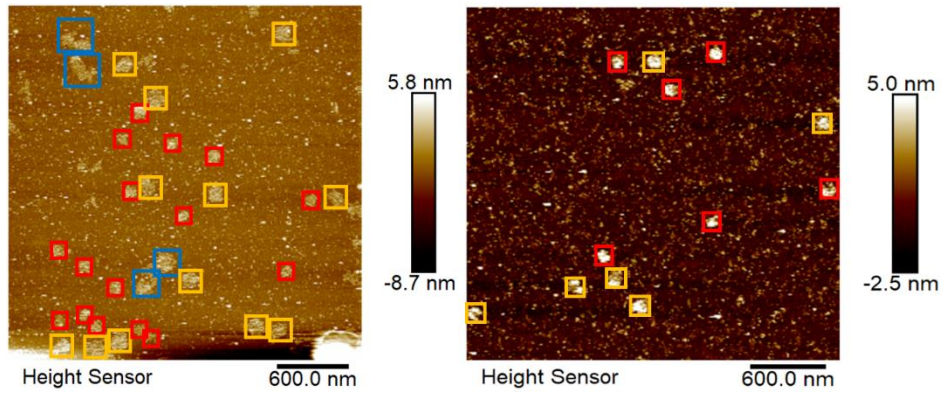

### Average Value and Standard Deviation (S)

$$S = \sqrt{\frac{\sum_{i=1}^n (x_i - \bar{x})^2}{n}}$$

$$\text{Number}_{\text{red}} / \text{Number}_{\text{total}} = (50.0\% + 44.7\% + 50.0\%) / 3 = 48.2 (\pm 2.5)\%$$

$$\text{Number}_{\text{yellow}} / \text{Number}_{\text{total}} = (33.3\% + 39.5\% + 40.9\%) / 3 = 37.9 (\pm 3.3)\%$$

$$\text{Number}_{\text{blue}} / \text{Number}_{\text{total}} = (16.7\% + 15.8\% + 9.1\%) / 3 = 13.9 (\pm 3.4)\%$$

**Fig. S8.** AFM images of (3AJ<sup>2</sup>-3E + 3AJ-3E) at 0.2 μM 3AJ<sup>2</sup>-3E. The particles framed in red, yellow and blue are nanocage I, nanocage II, and nanocage III, respectively.

Assuming that the nanocage number proportions deposited on mica are the same as in solution, we counted the numbers of three types of nanocages in three batches of typical samples and calculated their number proportions of 48.2(±2.5)% for nanocage I, 37.9(±3.3)% for nanocage II, and 13.9(±3.4)% for nanocage III.



### Sample 1

Number<sub>total</sub> = 45

Number<sub>red</sub> = 5 + 3 + 1 = 9; Number<sub>red</sub> / Number<sub>total</sub> = 20.0%

Number<sub>yellow</sub> = 11 + 8 + 5 = 24; Number<sub>yellow</sub> / Number<sub>total</sub> = 53.3%

Number<sub>blue</sub> = 4 + 3 + 5 = 12; Number<sub>blue</sub> / Number<sub>total</sub> = 26.7%

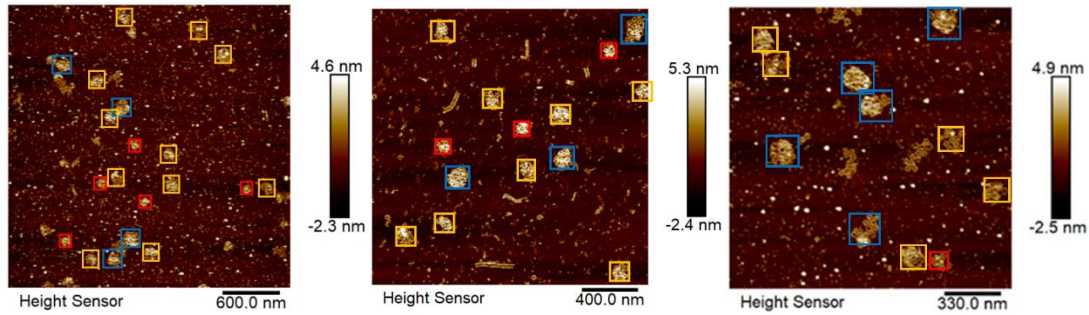

### Sample 2

Number<sub>total</sub> = 47

Number<sub>red</sub> = 6 + 2 + 1 = 9; Number<sub>red</sub> / Number<sub>total</sub> = 19.1%

Number<sub>yellow</sub> = 15 + 4 + 3 = 22; Number<sub>yellow</sub> / Number<sub>total</sub> = 46.9%

Number<sub>blue</sub> = 4 + 5 + 7 = 16; Number<sub>blue</sub> / Number<sub>total</sub> = 34.0%

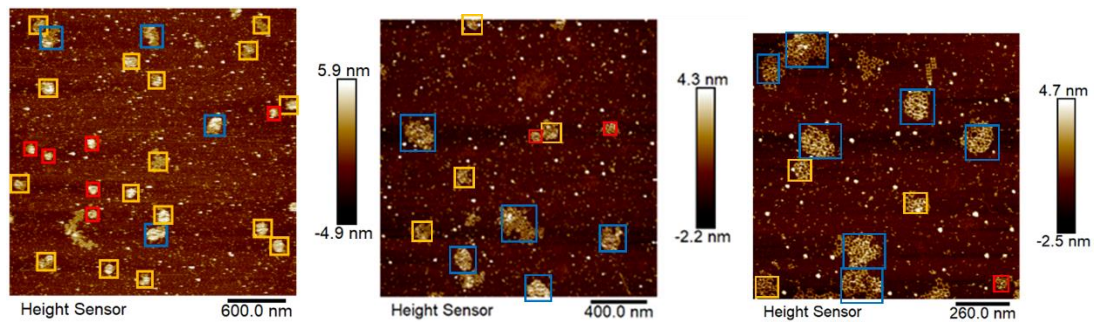

### Sample 3

Number<sub>total</sub> = 46

Number<sub>red</sub> = 6 + 2 + 3 = 11; Number<sub>red</sub> / Number<sub>total</sub> = 23.9%

Number<sub>yellow</sub> = 14 + 5 + 6 = 25; Number<sub>yellow</sub> / Number<sub>total</sub> = 54.3%

Number<sub>blue</sub> = 3 + 2 + 5 = 10; Number<sub>blue</sub> / Number<sub>total</sub> = 21.8%

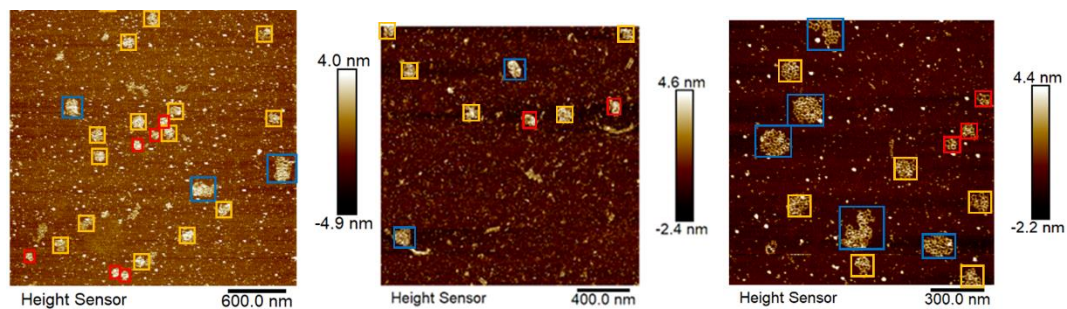

### Average Value and Standard Deviation (S)

$$\text{Number}_{\text{red}} / \text{Number}_{\text{total}} = (20\% + 19.1\% + 23.9\%) / 3 = 21.0 (\pm 2.1)\%$$

$$\text{Number}_{\text{yellow}} / \text{Number}_{\text{total}} = (53.3\% + 46.9\% + 54.3\%) / 3 = 51.5 (\pm 3.3)\%$$

$$\text{Number}_{\text{blue}} / \text{Number}_{\text{total}} = (26.7\% + 34.0\% + 21.8\%) / 3 = 27.5 (\pm 5.0)\%$$

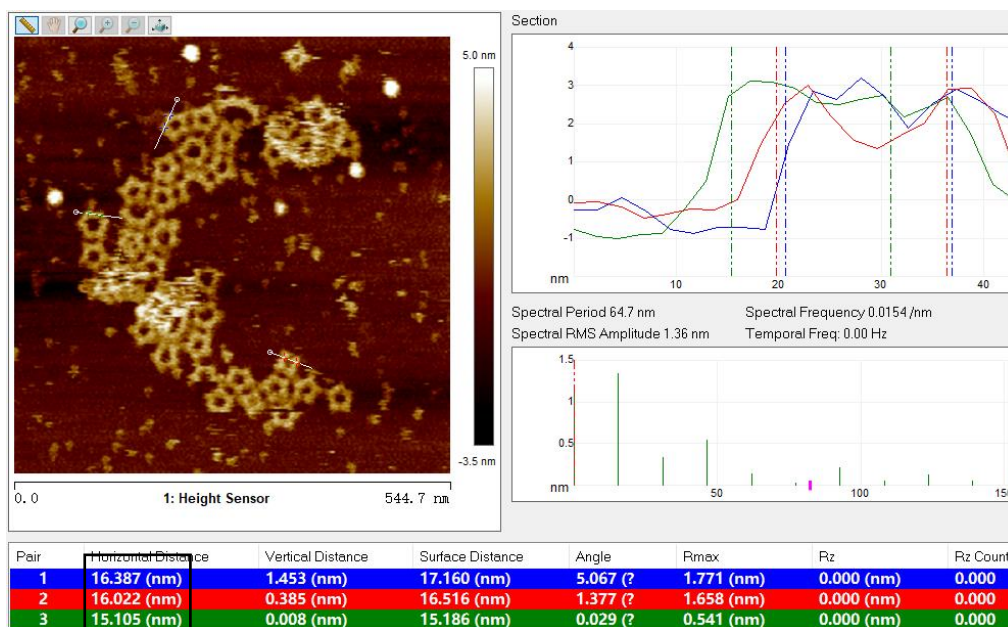

**Fig. S9.** AFM images of (3AJ<sup>2</sup>-3E + 3AJ-3E) at 0.5 μM 3AJ<sup>2</sup>-3E. The particles framed in red, yellow and blue are nanocage I, nanocage II and nanocage III, respectively. Assuming that the nanocage number proportions deposited on mica are the same as in solution, we counted the numbers of three types of nanocages in three batches of typical samples and calculated their number proportions of 21(±2.1)% for nanocage I, 51.5(±3.3)% for nanocage II, and 27.5(±5.0)% for nanocage III. The side lengths of 4-, 5- and 6-membered rings are indicated as 16.022, 16.387, and 15.105 nm from their section profiles.



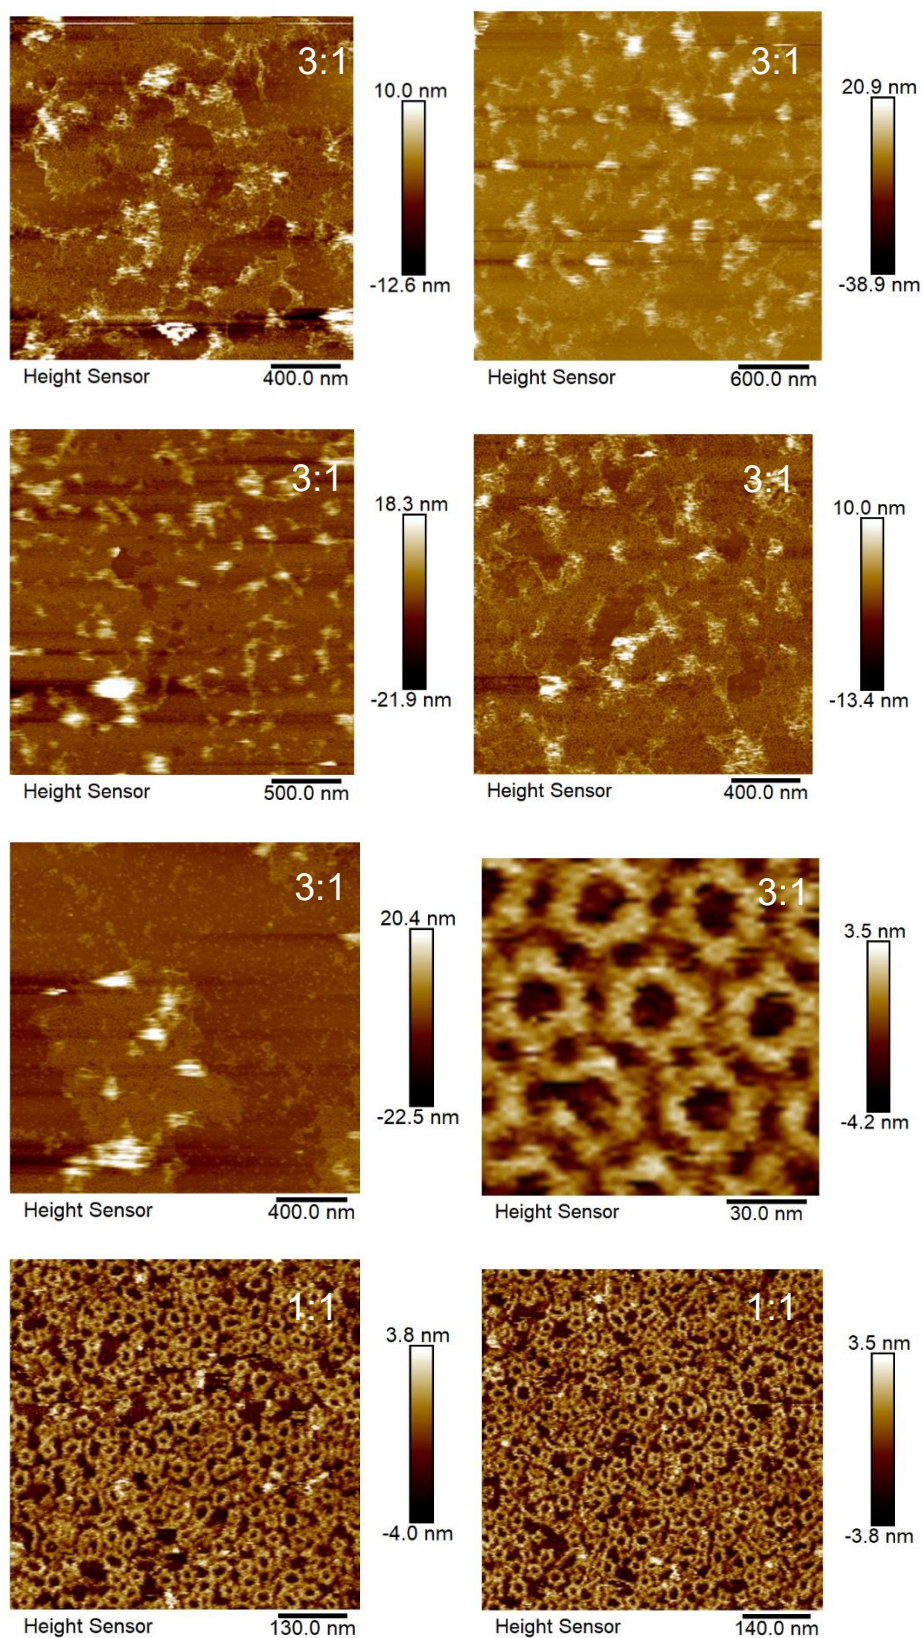

**Fig. S10.** More AFM images of (3AJ<sup>2</sup>-EOE + 3AJ-3O) with the stoichiometric ratio of 3AJ<sup>2</sup>-EOE/3AJ-3O at 3:1 and 1:1, labelled at the upper right corner.



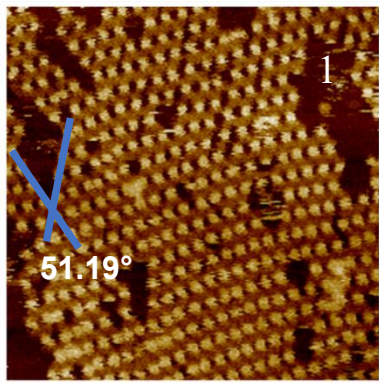

Height Sensor 70.0 nm

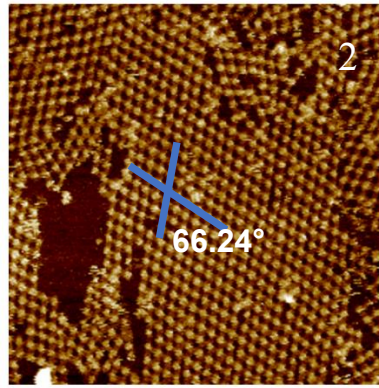

Height Sensor 120.0 nm

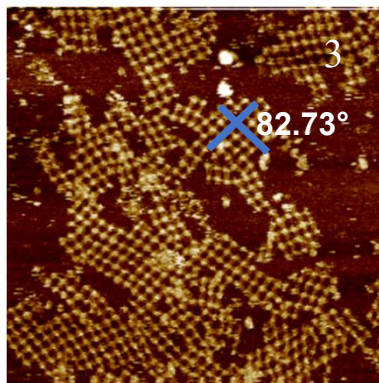

Height Sensor 140.0 nm

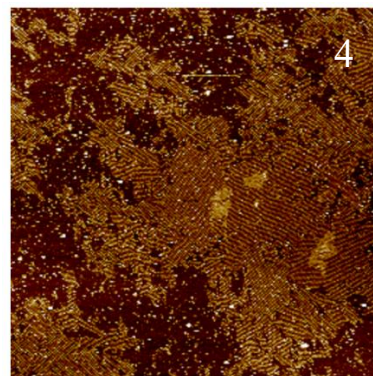

Height Sensor 600.0 nm

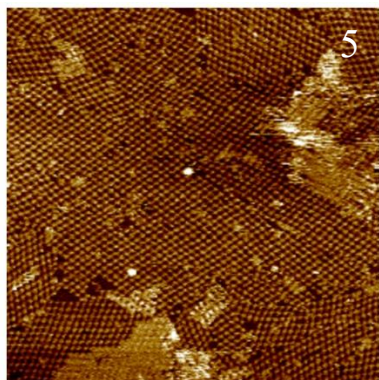

Height Sensor 200.0 nm

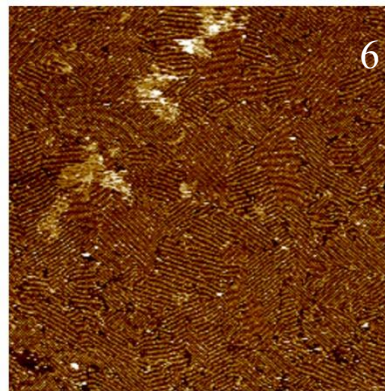

Height Sensor 600.0 nm

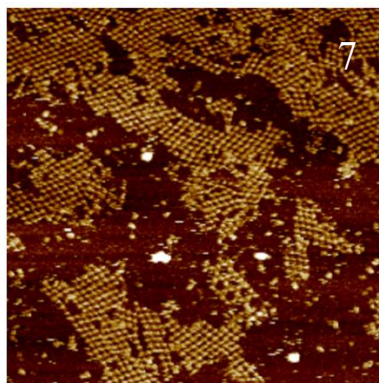

Height Sensor 200.0 nm

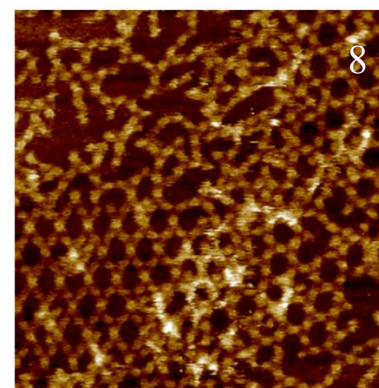

Height Sensor 100.0 nm



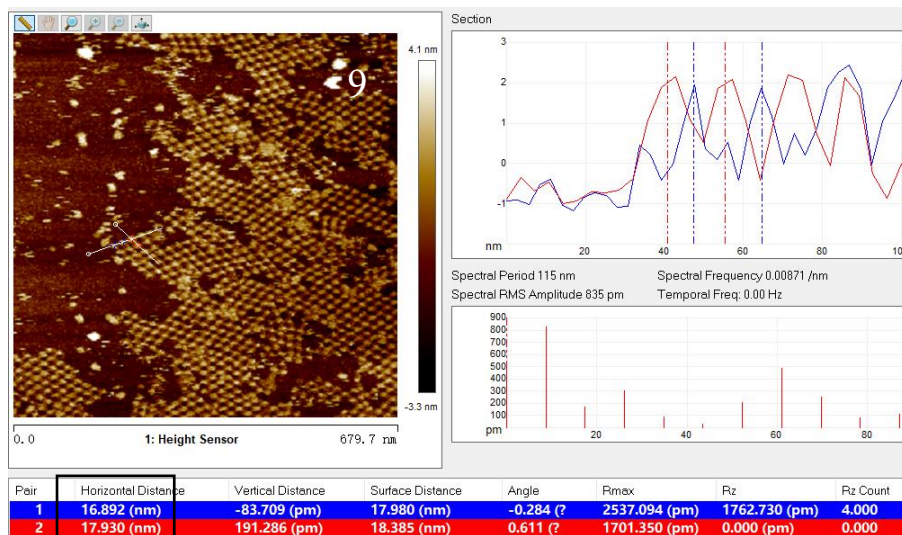

**Fig. S11.** More AFM images of 4AJ<sup>2</sup>-4E in fluid. The angle of rhombus lattice from different singly crystalline domains can vary at 51°, 66°, and 83°, which are labelled images of 1, 2, and 3. From the 4<sup>th</sup> to 6<sup>th</sup> images, polycrystalline 2D arrays composed of several to many single crystalline domains are shown. In the 7<sup>th</sup> image, a very small 3•6•3•6 tiling pattern can be found at the central bottom region. The 8<sup>th</sup> image is a zoom-in image of the 3•6•3•6 tiling pattern assembled via adjacent connection of specific base pairing. In the 9<sup>th</sup> image, the rhombus lattice linear constant is measured as 17.5 nm from the section profiles.
